# Supplementary material for: Pink1-mediated mitophagy in the endothelium releases proteins encoded by mitochondrial DNA and activates neutrophil responses during inflammation
Source: eLife journal article supplement (doi:10.7554/elife.82205), 2026-07-01

Figure 3, figure supplement 2 A

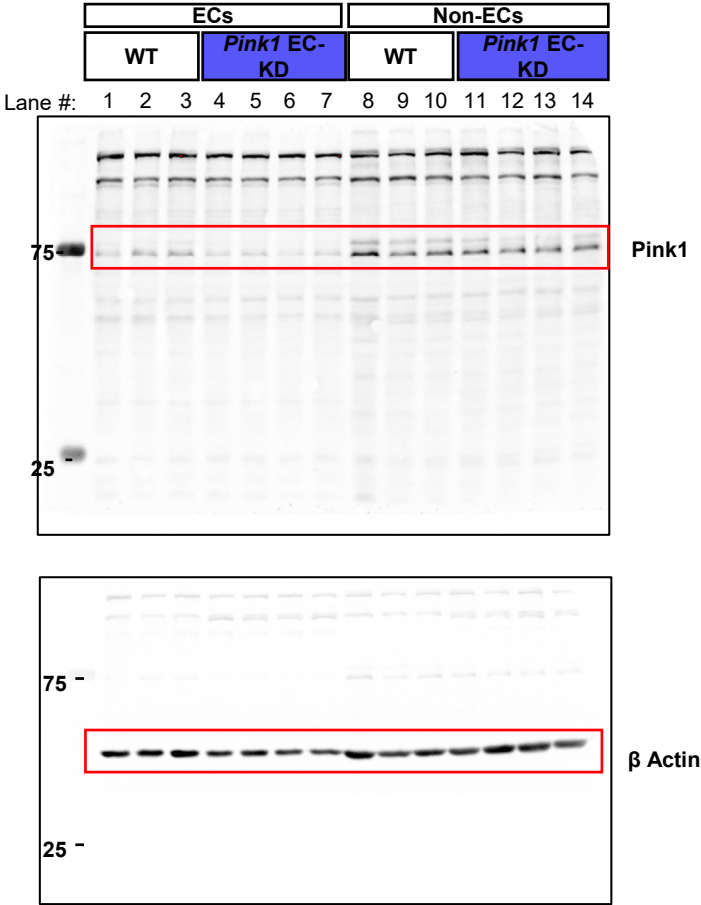

Supplement: supp [file elife_poa_e82205_Figure_3_figure_supplement_2_source_data_2.pdf › elife_poa_e82205_Figure_3_figure_supplement_2_source_data_2.pdf]
