# Supplementary figures and images for: Pink1-mediated mitophagy in the endothelium releases proteins encoded by mitochondrial DNA and activates neutrophil responses during inflammation
Source: eLife journal article supplement (doi:10.7554/elife.82205), 2026-07-01

Figure 1, figure supplement 1

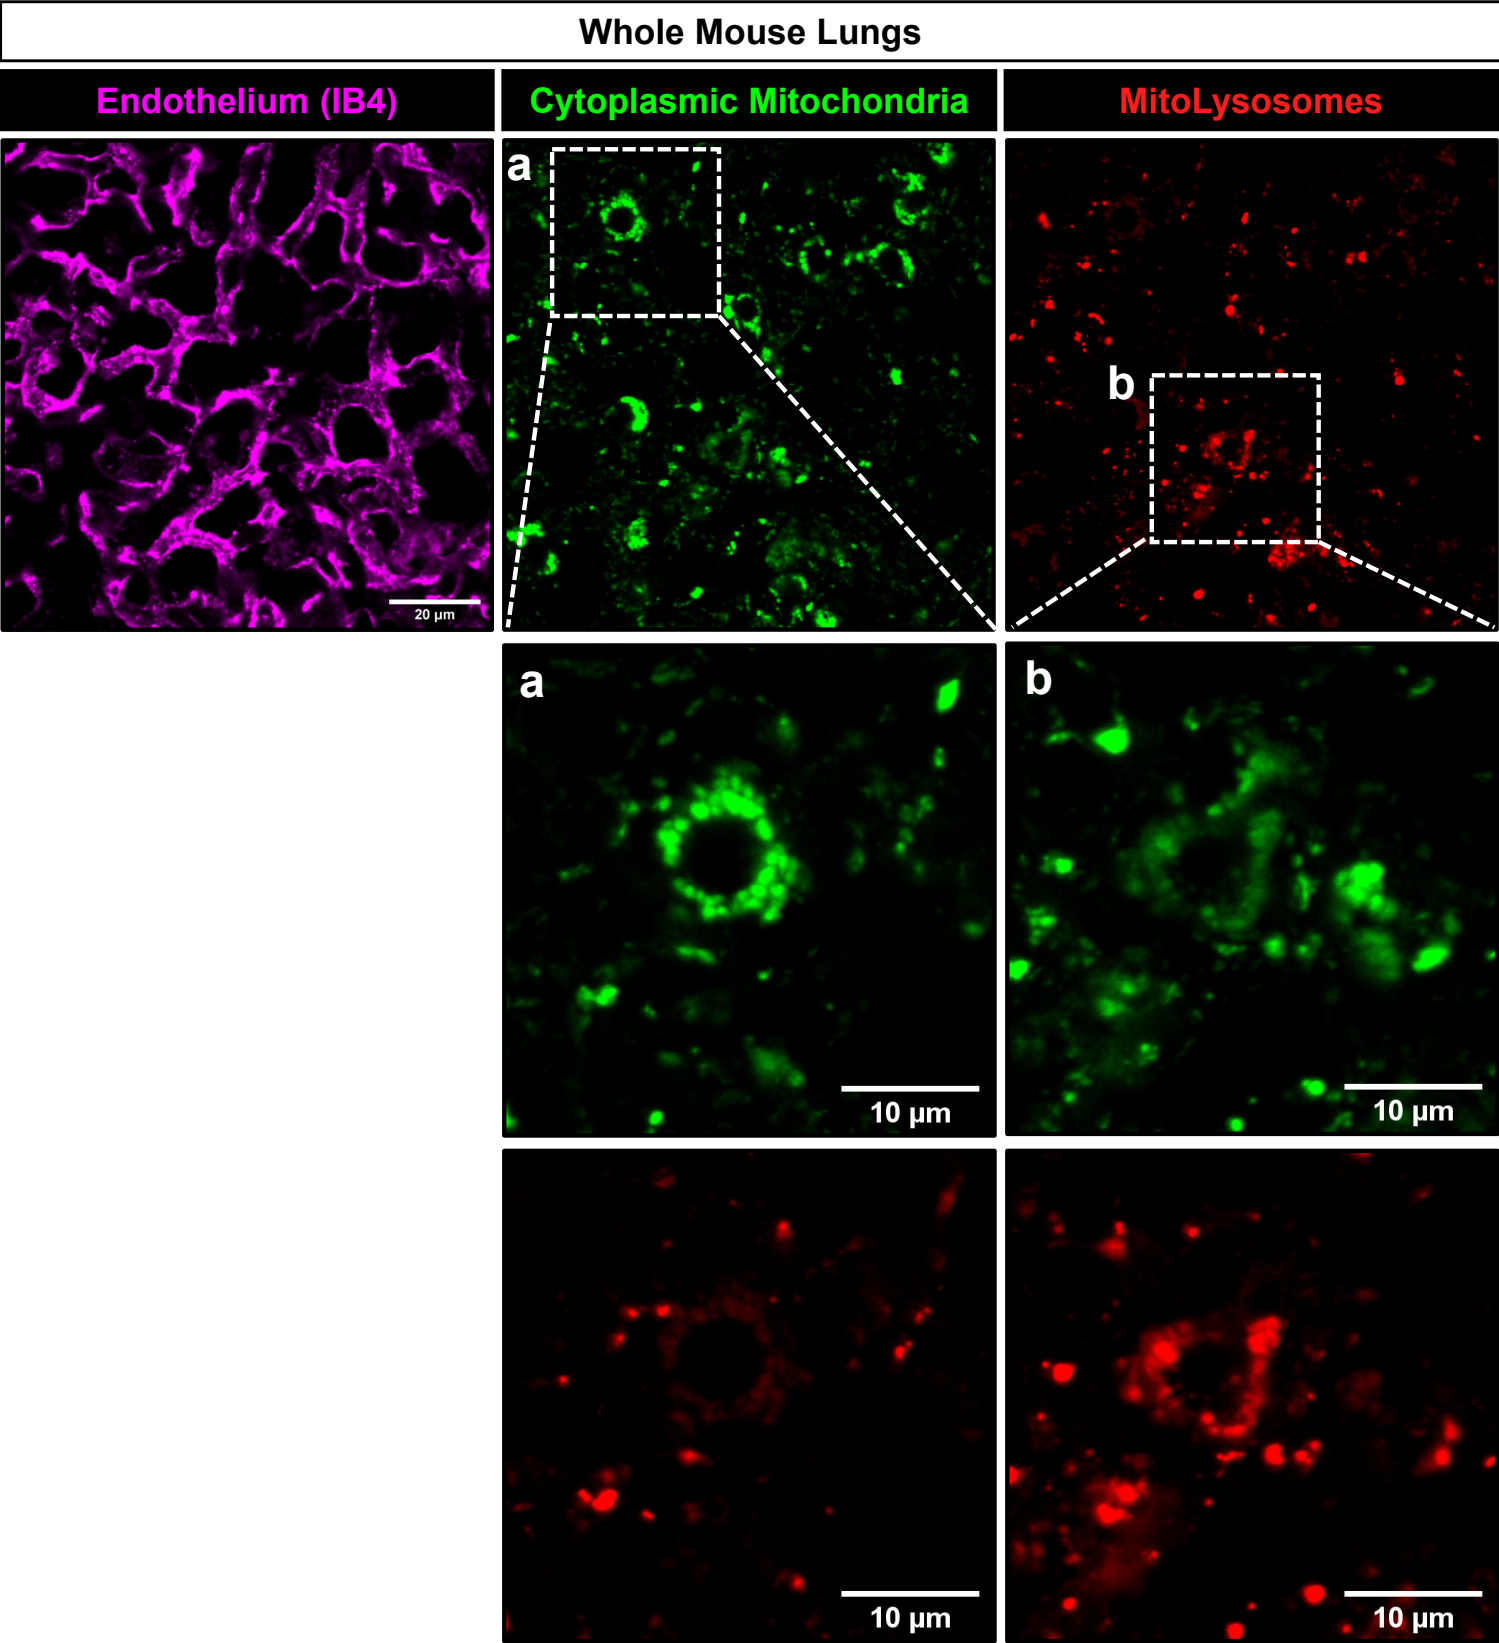

Supplement: supp [file elife_poa_e82205_Figure_1_figure_supplement_1.pdf › elife_poa_e82205_Figure_1_figure_supplement_1.pdf]

Figure 2, figure supplement 1

A

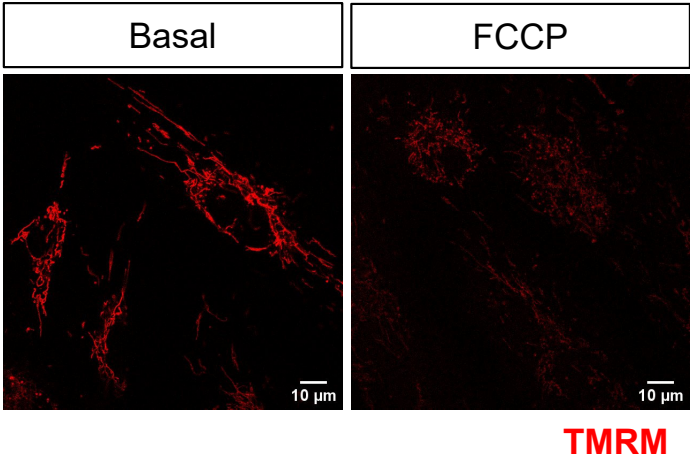

B

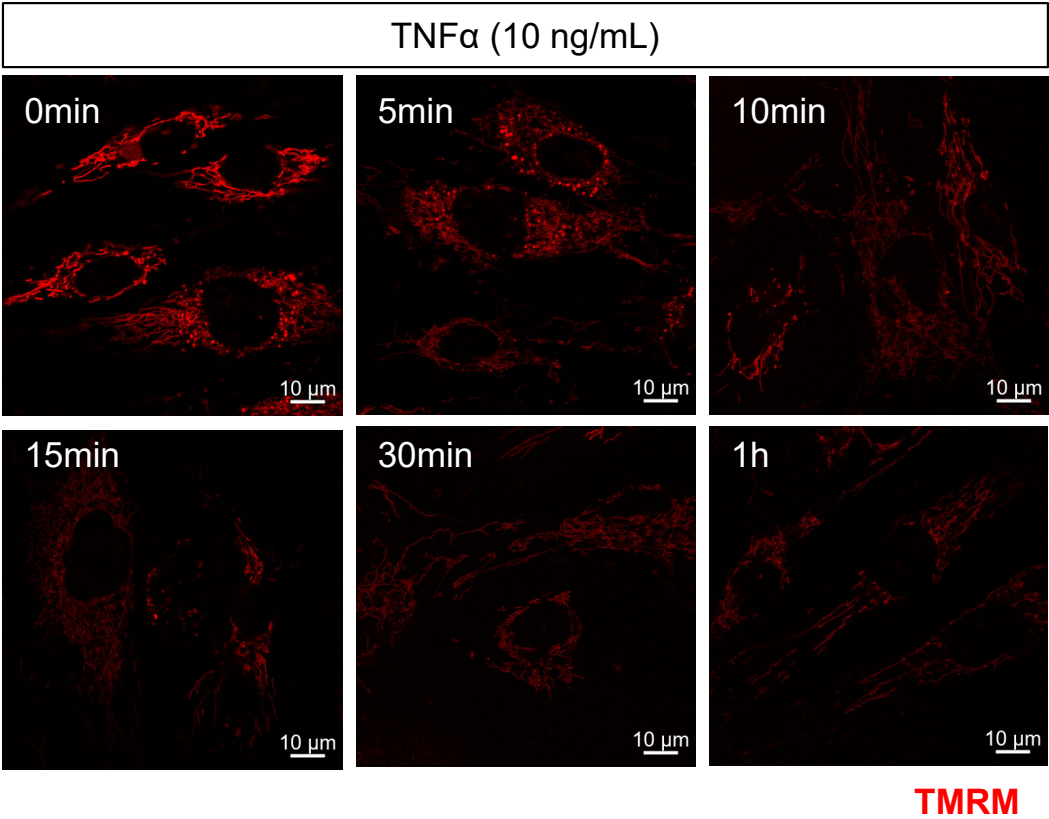

C

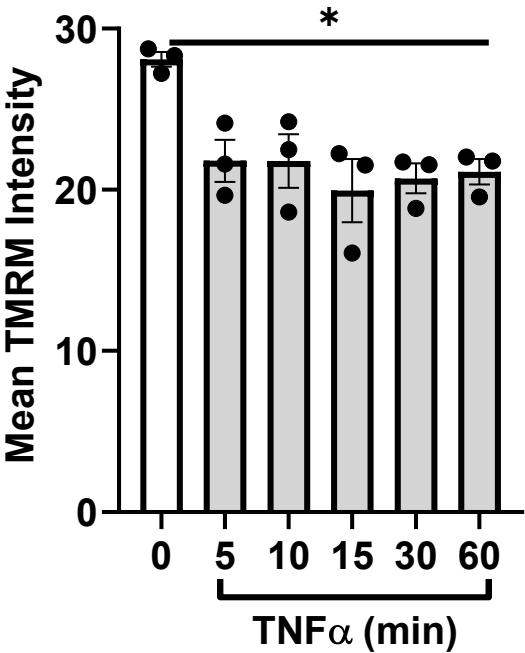

Supplement: supp [file elife_poa_e82205_Figure_2_figure_supplement_1.pdf › elife_poa_e82205_Figure_2_figure_supplement_1.pdf]

Figure 2, figure supplement 2

A

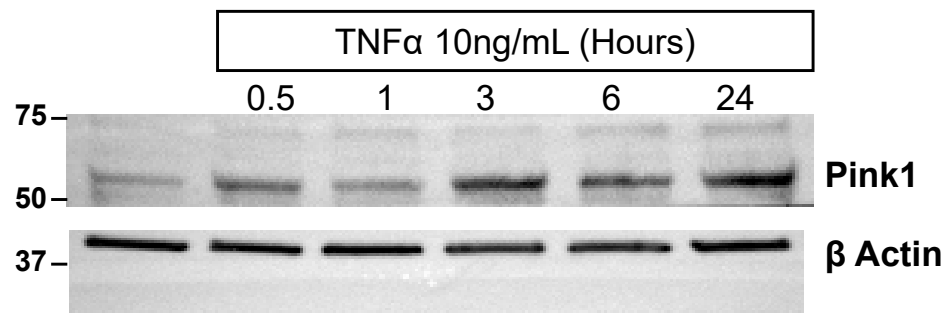

B

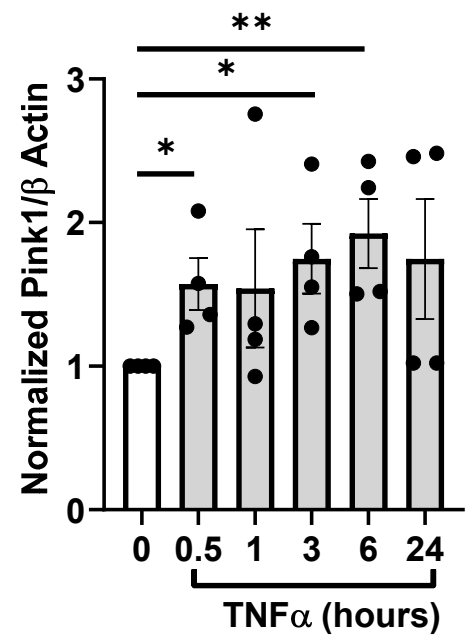

Supplement: supp [file elife_poa_e82205_Figure_2_figure_supplement_2.pdf › elife_poa_e82205_Figure_2_figure_supplement_2.pdf]

Figure 2, figure supplement 3

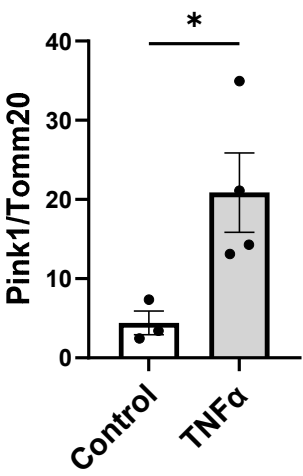

Supplement: supp [file elife_poa_e82205_Figure_2_figure_supplement_3.pdf › elife_poa_e82205_Figure_2_figure_supplement_3.pdf]

**Figure 3**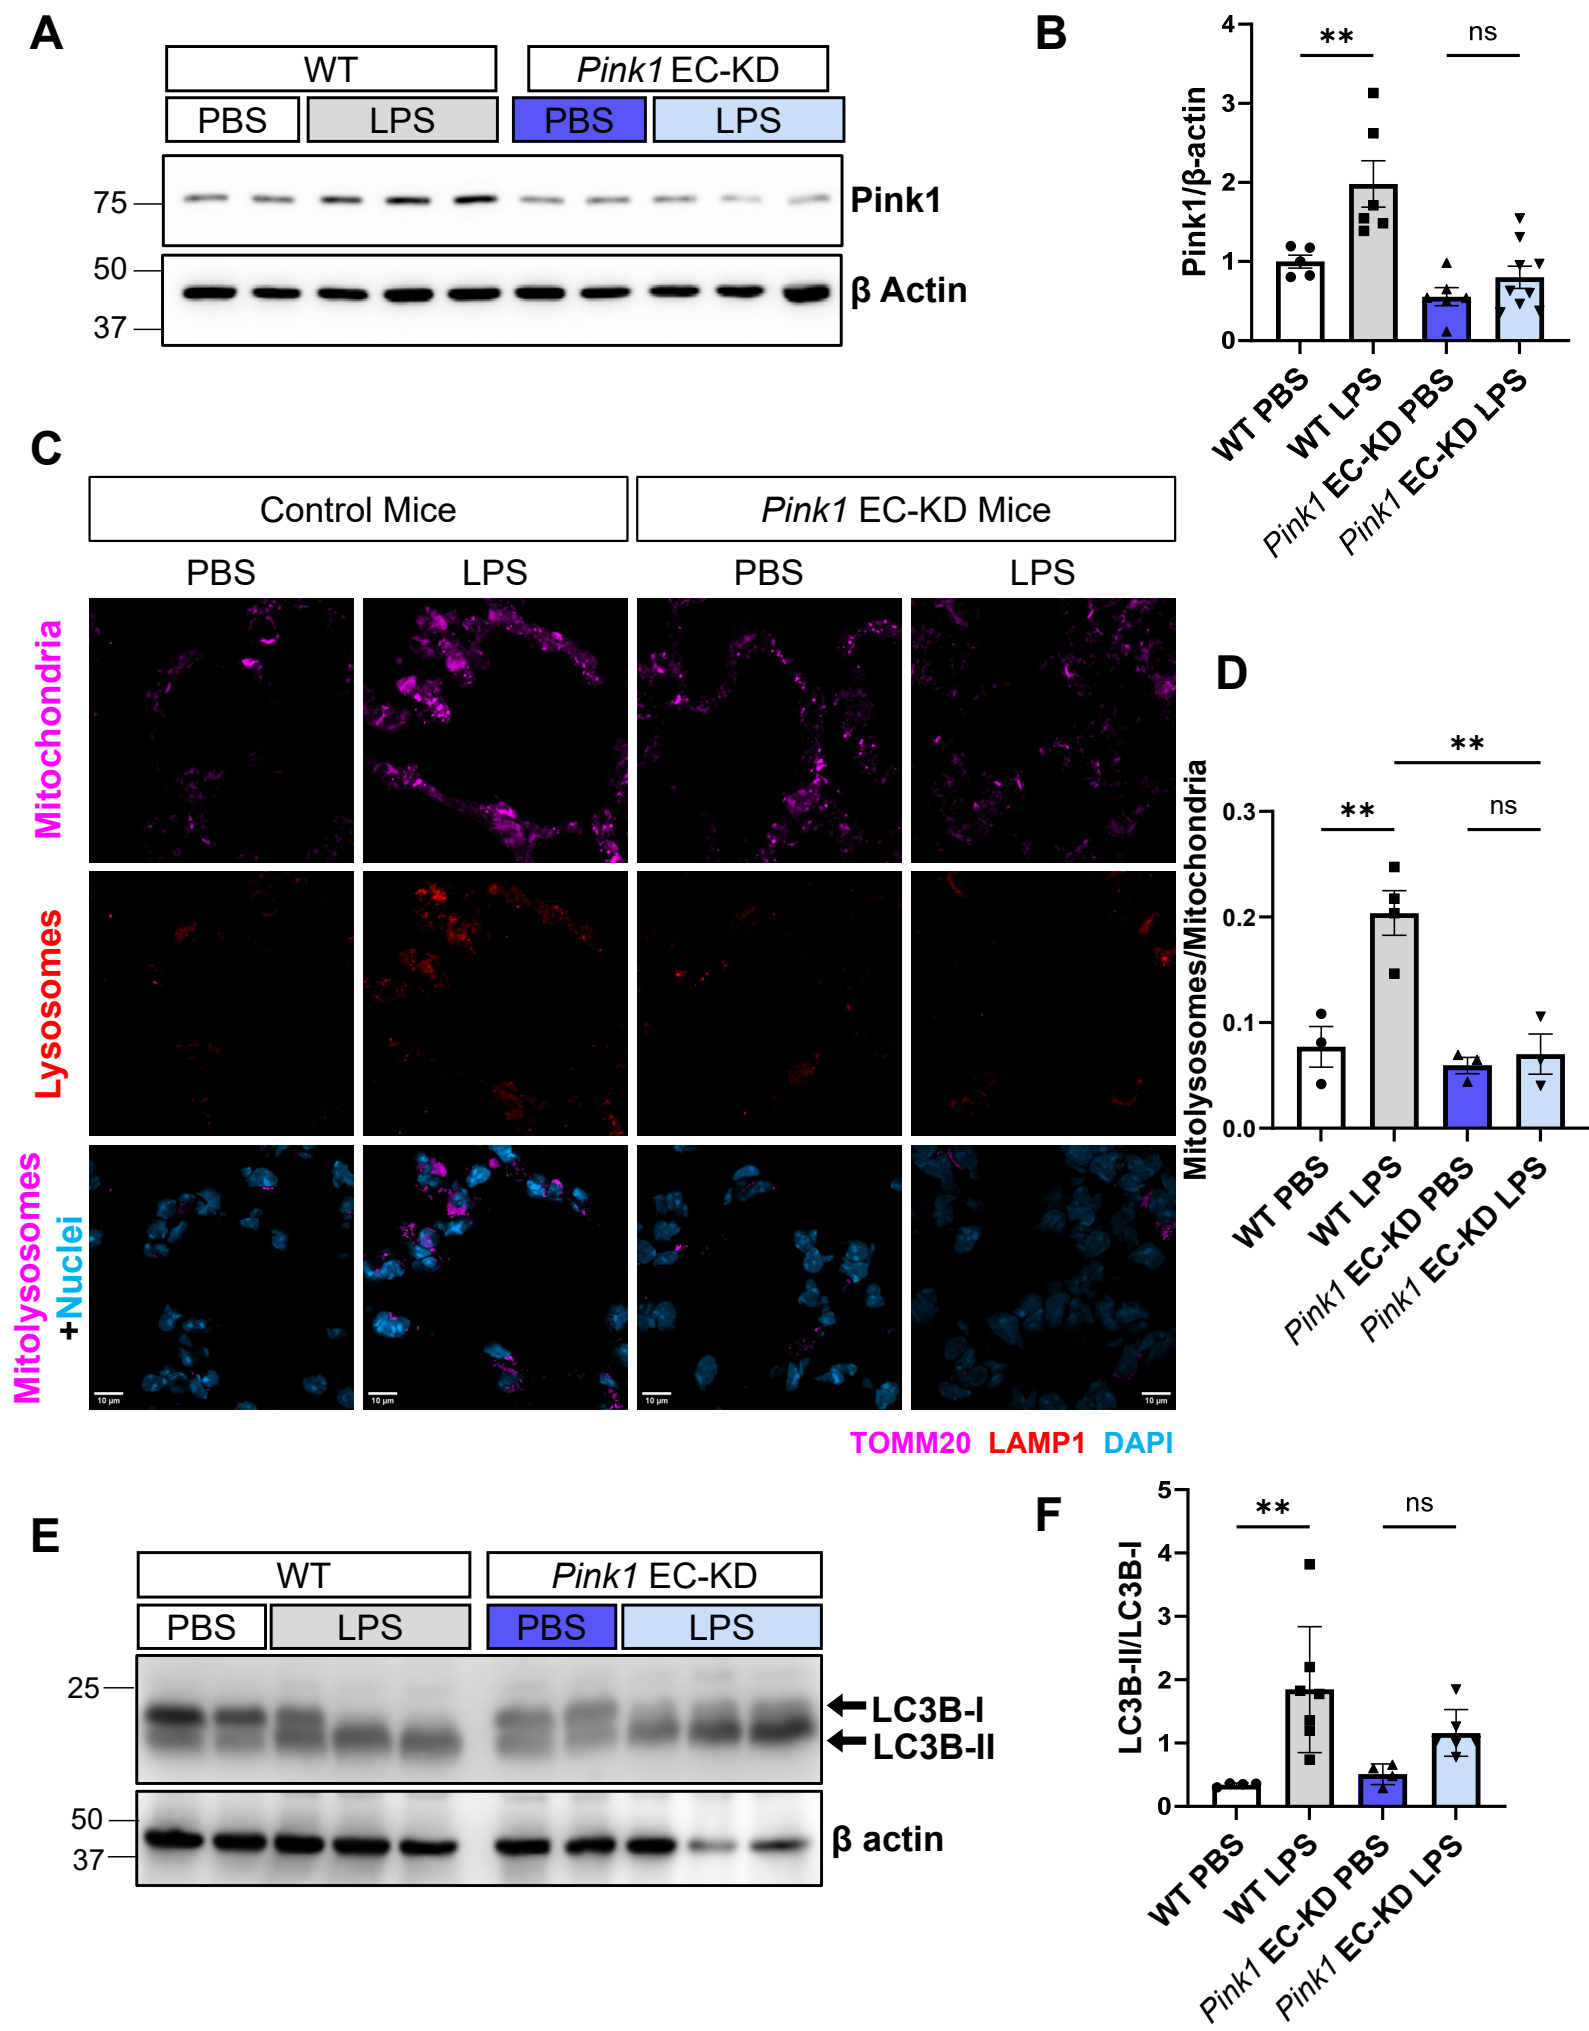

Supplement: supp [file elife_poa_e82205_Figure_3_figure_supplement_1.pdf › elife_poa_e82205_Figure_3_figure_supplement_1.pdf]

Figure 3, figure supplement 2

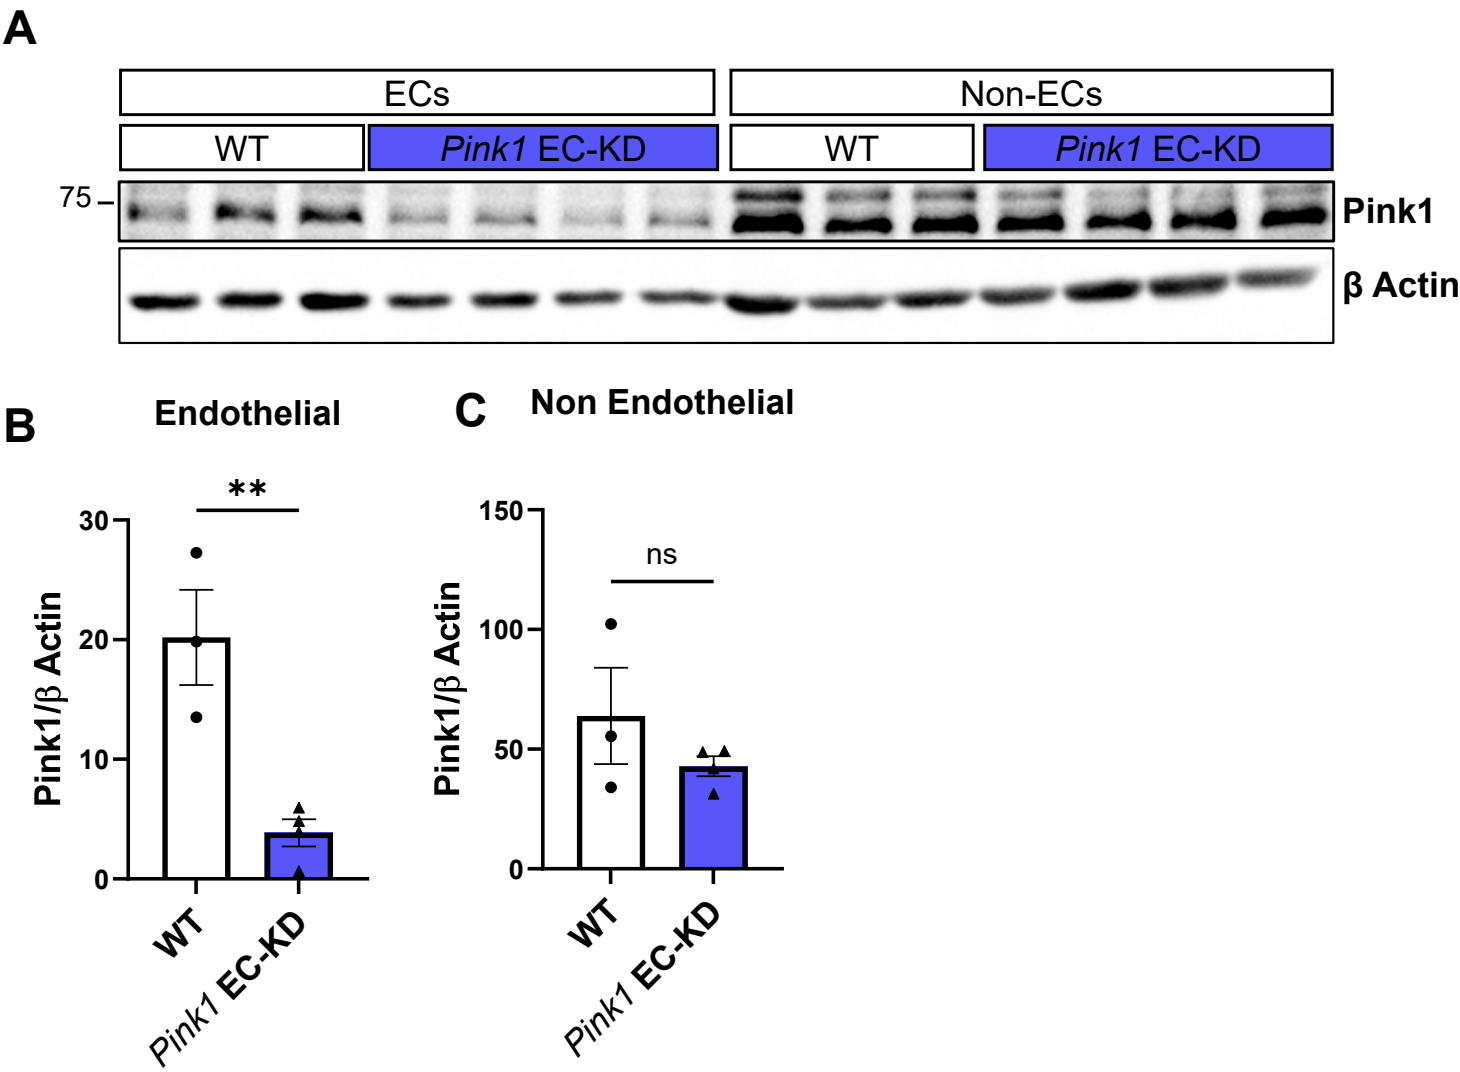

Supplement: supp [file elife_poa_e82205_Figure_3_figure_supplement_2.pdf › elife_poa_e82205_Figure_3_figure_supplement_2.pdf]

Figure 4, figure supplement 1

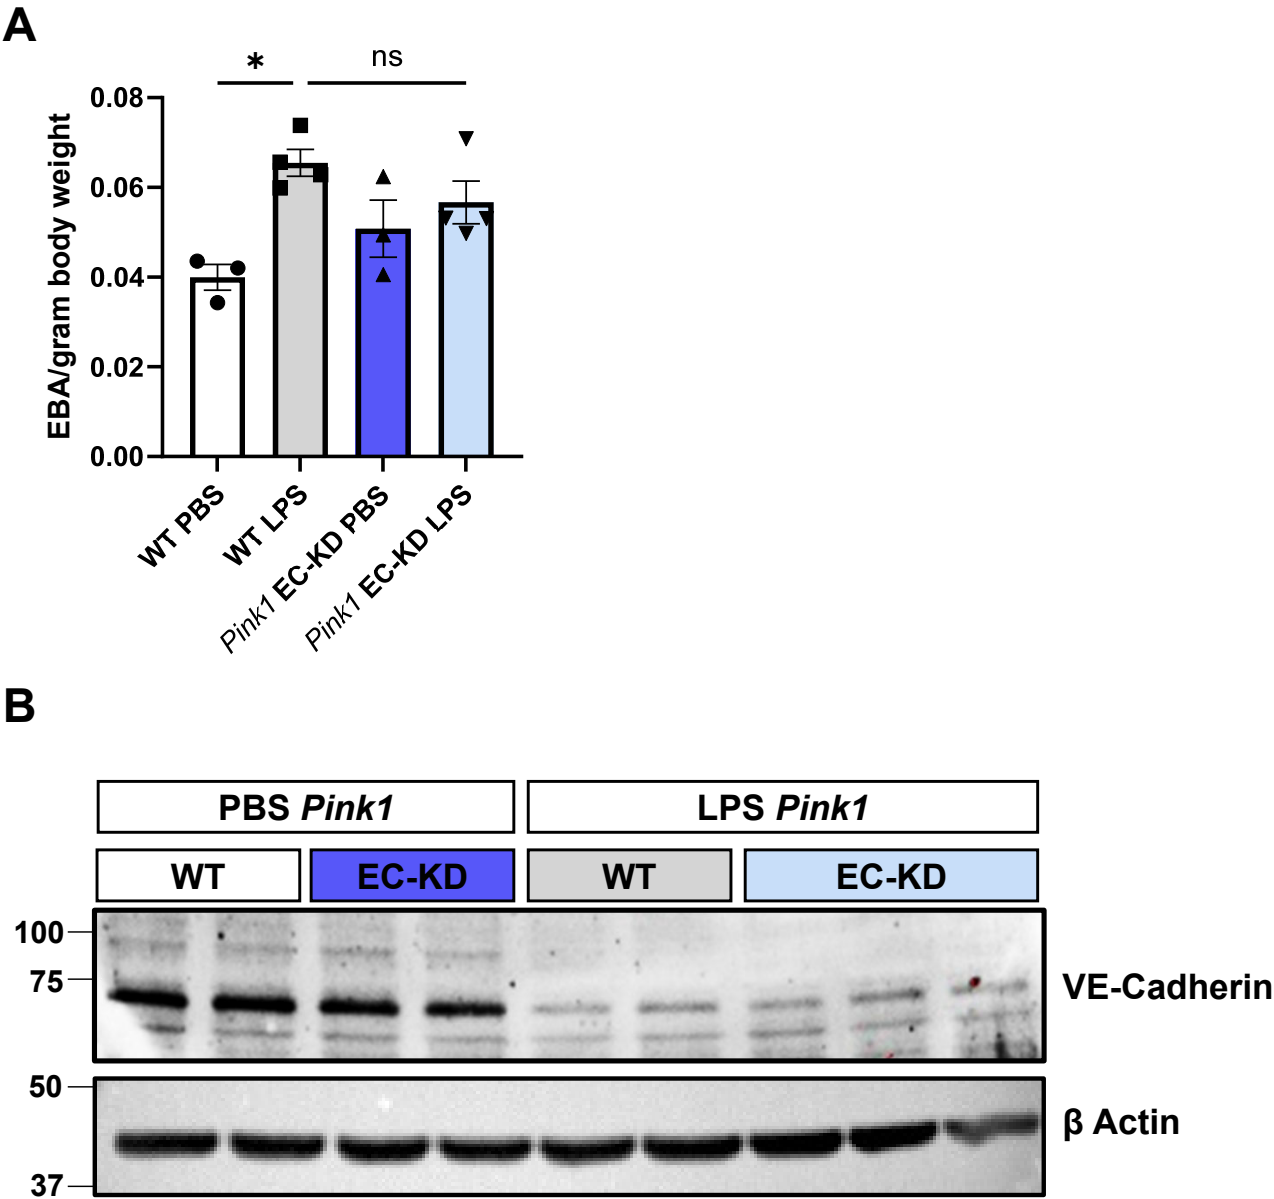

Supplement: supp [file elife_poa_e82205_Figure_4_figure_supplement_1.pdf › elife_poa_e82205_Figure_4_figure_supplement_1.pdf]

Figure 4, figure supplement 2

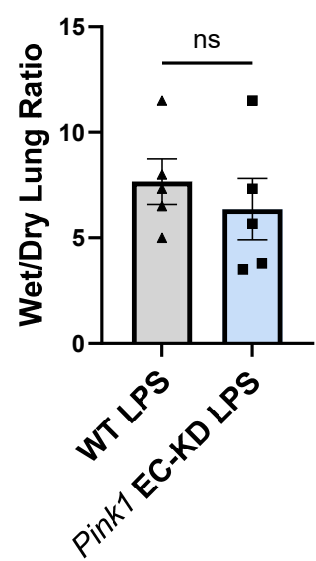

Supplement: supp [file elife_poa_e82205_Figure_4_figure_supplement_2.pdf › elife_poa_e82205_Figure_4_figure_supplement_2.pdf]

Figure 4, figure supplement 3

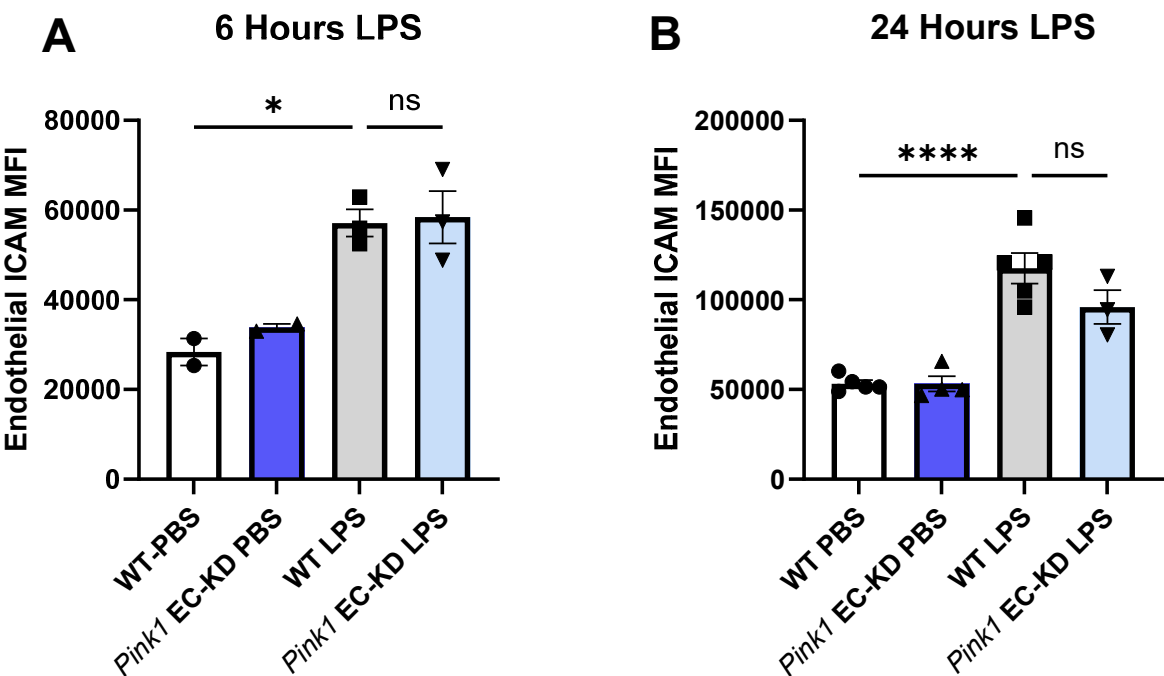

Supplement: supp [file elife_poa_e82205_Figure_4_figure_supplement_3.pdf › elife_poa_e82205_Figure_4_figure_supplement_3.pdf]

Figure 5, figure supplement 1

A

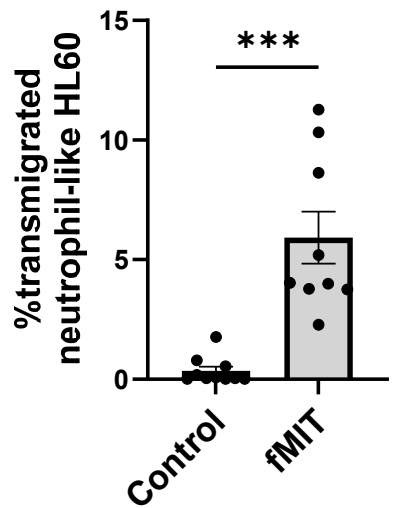

B

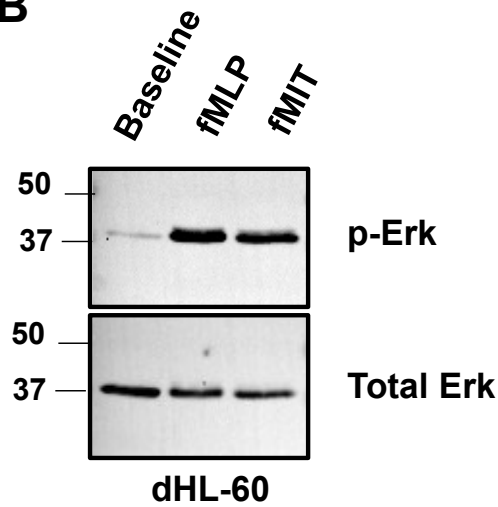

C

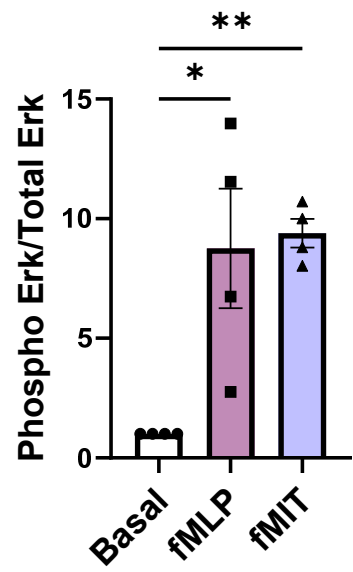

Supplement: supp [file elife_poa_e82205_Figure_5_figure_supplement_1.pdf › elife_poa_e82205_Figure_5_figure_supplement_1.pdf]
